# Supplementary material for: Theory and simulation of diffusion–adsorption into a molecularly imprinted mesoporous film and its nanostructured counterparts. Experimental application for trace explosive detection
Source: Royal Society of Chemistry journal article supplement (doi:10.1039/c4ra07000c), 2014-01-01
Supplement: c4ra07000c1.pdf [file c4ra07000c1.pdf]

## Supporting information

### 1. Glossary

Symbols and the corresponding units in this work:

|                 |                                                                                                  |
|-----------------|--------------------------------------------------------------------------------------------------|
| $C^{av}$        | the statistically average concentration of the analyte in mesopore channel, mol/cm <sup>3</sup>  |
| $q$             | the statistically average concentration of the analyte in macropore channel, mol/cm <sup>3</sup> |
| $C_0^b$         | the concentration of target species under the saturated vapor pressure, mol/cm <sup>3</sup>      |
| $D_{pore}$      | diffusion coefficient inside the pore, cm <sup>2</sup> /s                                        |
| $L$             | the half average length of the tube, cm                                                          |
| $r_{pore}$      | the inner radius of mesopore, cm                                                                 |
| $R$             | the diameter of the used colloidal particle, cm                                                  |
| $H$             | the film thickness, cm                                                                           |
| $\Gamma_{site}$ | the surface concentration of binding sites decorating the mesopore wall, mol/cm <sup>2</sup>     |
| $f(y)$          | the distribution function of binding sites inside the pore wall surface                          |
| $k_{ads}$       | adsorption rate constant, cm <sup>3</sup> /mol/s                                                 |
| $k_{des}$       | desorption rate constant, s <sup>-1</sup>                                                        |
| $k_{app-ads}$   | the apparent adsorption rate constant, cm <sup>3</sup> /mol/s                                    |
| $k_{app-des}$   | the apparent desorption rate constant, s <sup>-1</sup>                                           |
| $K_{des}$       | desorption equilibrium constant, cm <sup>3</sup> /mol                                            |
| $\rho, \varphi$ | the regulatory factors to describe the molecular imprinting efficiency                           |
| $y$             | normalized nanopore axial coordinate                                                             |
| $t$             | time, s                                                                                          |
| $\theta$        | the local pore wall coverage                                                                     |

$\beta$  the ratio between the molecule and nanopore size

## 2. The average length of nanotube in macro-mesoporous film

When the diameter of mesopore is  $r$ , the diameter of the equivalent sphere is  $R$ , and the thickness of wall is  $d$ , in the cross-section of the equivalent sphere, the number of the tube is:

$$N = \frac{R-d}{r+d}$$

When the number of  $N$  is odd, the length of tube  $l_n$  is:

$$l_n = 2\sqrt{(R/2)^2 - [(n-1)(r+d)]^2}$$

Then the average length of tube is:

$$L_{av} = \langle l_n \rangle = \frac{R + \sum_{n=2}^{(N-1)/2} 2\sqrt{(R/2)^2 - [(n-1)(r+d)]^2}}{N}$$

When the number of  $N$  is even, the length of tube  $l_n$  is:

$$l_n = 2\sqrt{(R/2)^2 - [(n-1/2)(r+d)]^2}$$

Then the average length of tube is:

$$L_{av} = \langle l_n \rangle = \frac{2 \sum_{n=1}^{N/2} 2\sqrt{(R/2)^2 - [(n-1/2)(r+d)]^2}}{N}$$

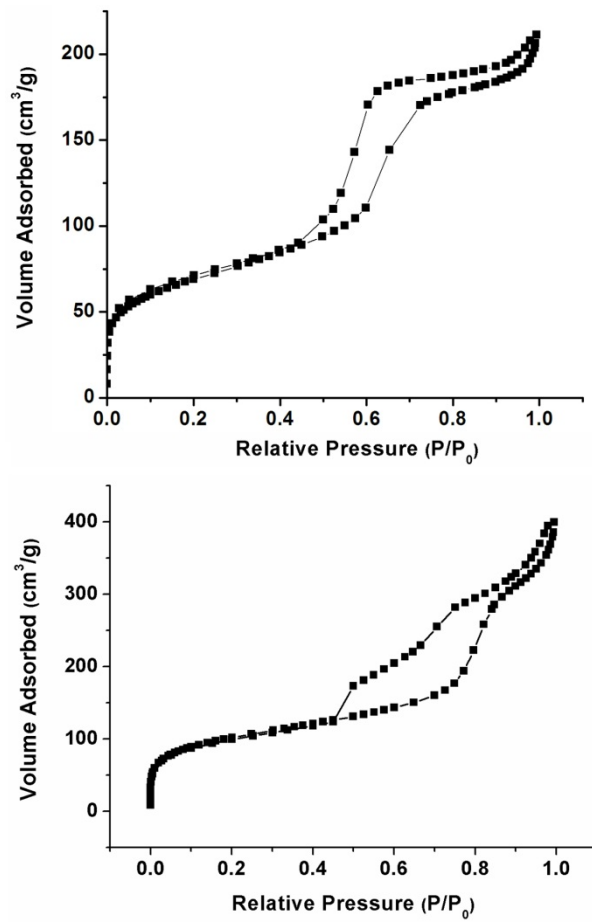

**Figure S1.** N<sub>2</sub> adsorption-desorption isotherms of the synthesized mesoporous (Top) and macro-mesoporous film (Bottom).

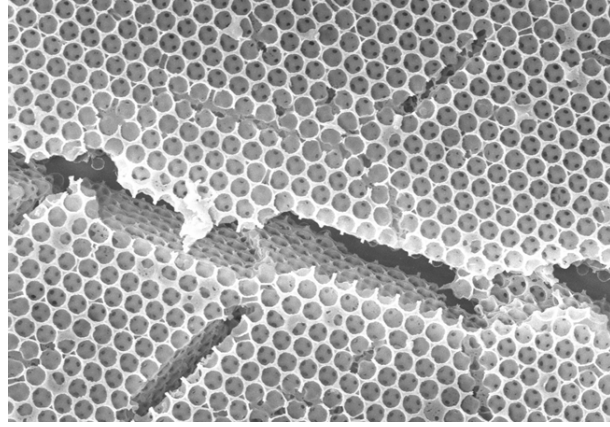

**Figure S2.** SEM image of the molecularly imprinted macro-mesoporous film after the extraction of all used templates.

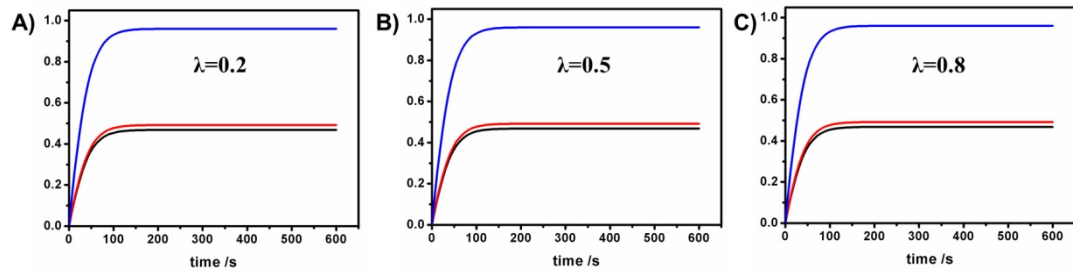

**Figure S3.** Dependence of the sensing behaviors on the variation of  $\lambda$ .  $D_{pore} / L^2 = 13$ ,

$$2\Gamma_{site} / (C_0^b r_{pore}) = 1000, \quad k_{ads} C_0^b = 0.02, \quad K_{des} = 0.085, \quad k'_{ads} = 1.05k_{ads}, \quad K'_{des} = 0.95K_{des},$$

where  $\lambda = 0.2$  for (A),  $\lambda = 0.5$  for (B), and  $\lambda = 0.8$  for (C).
